# Supplementary material for: Squalene Loaded Nanoparticles Effectively Protect Hepatic AML12 Cell Lines against Oxidative and Endoplasmic Reticulum Stress in a TXNDC5-Dependent Way
Source: MDPI journal article supplement (doi:10.3390/antiox11030581), 2022-03-18
Supplement: s1 [file s1]

**Supplementary Table S1.** Sequences of real-time PCR primers according to MIQE guidelines  
Abbreviations: *Ppib*, peptidylprolyl isomerase B; *Tbp*, TATA box binding protein; *Gpx4*, glutathione peroxidase 4;

| Gene symbol    | Accession                                          | Primer sequence, sense/antisense ( 5'->3')         | Amplicon length | Exon  | Concentration | Efficiency |
|----------------|----------------------------------------------------|----------------------------------------------------|-----------------|-------|---------------|------------|
| <i>Ppib</i>    | NM_011149.2                                        | GGAGATGGCACAGGAGGAA<br>TAGTGCTTCAGCTTGAAGTTCTCAT   | 71              | 3/4   | 0.2 $\mu$ M   | 99%        |
| <i>Tbp</i>     | NM_013684.3                                        | GTGAGTTGCTTGCTCTGTGC<br>GCTGCGTTTTTGTGCAGAGT       | 359             | 8     | 0.2 $\mu$ M   | 104%       |
| <i>Gpx4</i>    | NM_008162.4<br>NM_001037741.4<br>NM_001367995.1    | ATGGATGAAAGTCCAGCCCAAG<br>CGGCAGGTCCTTCTCTATCAC    | 148             | 4/7   | 0.2 $\mu$ M   | 96%        |
| <i>Eif2ak3</i> | NM_010121.3<br>XM_011241202.3<br>XM_006505501.2    | TATGTTGGAAGGCTTGAGGTCC<br>GTACATTCAGATGCAGCTGTGC   | 178             | 13/14 | 0.2 $\mu$ M   | 95%        |
| <i>Atf6</i>    | NM_001081304.1<br>XM_030253420.2<br>XM_011238796.4 | GGTTCTTCCTCATGGACCAGAT<br>ATAGGTCTGACTCCCAAGGCAT   | 170             | 1/3   | 0.2 $\mu$ M   | 102%       |
| <i>Ern1</i>    | NM_023913.2                                        | AACAACCTGCCCAAACATCG<br>TGGTCGGTGTGTTGTCTGAA       | 109             | 11/12 | 0.2 $\mu$ M   | 93%        |
| <i>Txndc5</i>  | NM_001289599.1<br>NM_001289598.1<br>NM_145367.4    | CAGGCTTGTCAGATGTCACCAT<br>TAACCTCGTACCGAGTACTTGCTG | 82              | 9/10  | 0.2 $\mu$ M   | 92%        |

*Eif2ak3*, eukaryotic translation initiation factor 2 alpha kinase 3; *Atf6*, activating transcription factor 6; *Ern1*, endoplasmic reticulum (ER) to nucleus signaling 1; *Txndc5*, thioredoxin domain containing 5

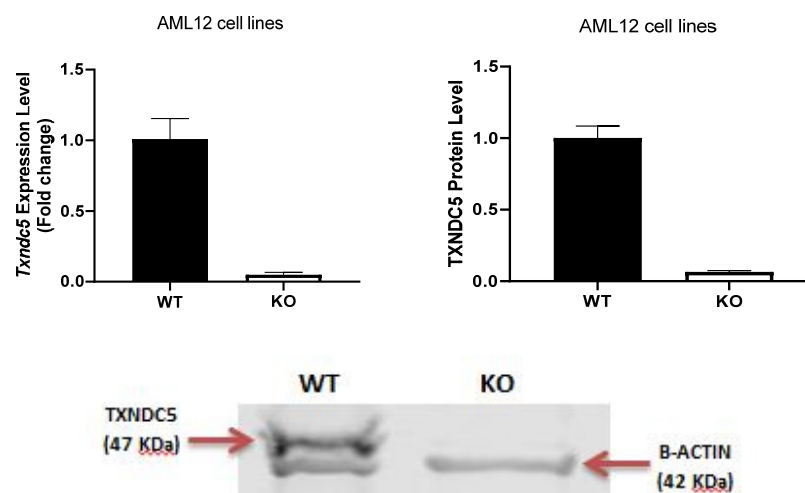

**Supplementary Figure S1.** Characterization of AML12 cell lines. *Txndc5* mRNA and protein levels in normal mouse hepatocyte AML12 cells (wildtype (WT)) and TXNDC5-deficient AML12 cells (knockout (KO))

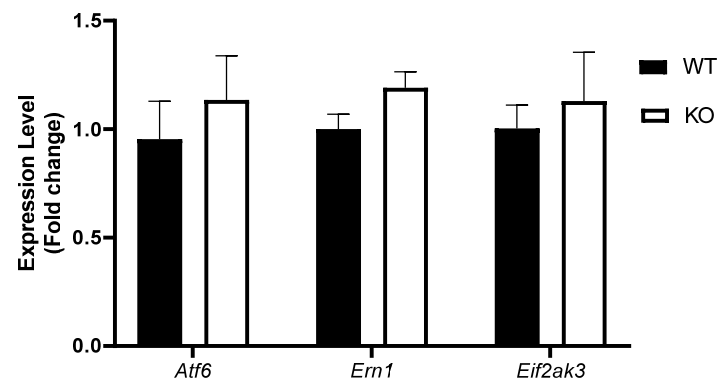

**Supplementary Figure S2.** The mRNA expressions of *Atf6*, *Ern1*, and *Eif2ak3* in WT and KO cells. Knockout of TXNDC5 increased the mRNA level of ER stress markers.
